# Supplementary material for: Host dependent maintenance of a blaNDM-1-encoding plasmid in clinical Escherichia coli isolates
Source: PubMed Central journal article supplement (PMC7283256; doi:10.1038/s41598-020-66239-8), 2020-06-09
Supplement: 41598_2020_66239_MOESM1_ESM.pdf [file 41598_2020_66239_MOESM1_ESM.pdf]

## Supplementary Information

### Host dependent maintenance of a *bla*<sub>NDM-1</sub>-encoding plasmid in clinical *Escherichia coli* isolates

João Alves Gama<sup>1†</sup>, Julia Kloos<sup>1†</sup>, Pål J Johnsen<sup>1</sup>, and Ørjan Samuelsen<sup>1,2\*</sup>

<sup>1</sup> Department of Pharmacy, Faculty of Health Sciences, UiT The Arctic University of Norway, Tromsø, Norway

<sup>2</sup> Norwegian National Advisory Unit on Detection of Antimicrobial Resistance, Department of Microbiology and Infection Control, University Hospital of North Norway, Tromsø, Norway

† These authors contributed equally to this work.

Table S1. Primer sequences used in the study

| Target gene                 | Direction | Sequence (5' to 3')      | Reference |
|-----------------------------|-----------|--------------------------|-----------|
| IncA/C2                     | F         | GAGAACCAAAGACAAAGACCTGGA | 1         |
|                             | R         | ACGACAAACCTGGATTGCTTCCTT | 1         |
| IncFIA                      | F         | CCATGCTGGTTCTAGAGAAGGTG  | 1         |
|                             | R         | GTATATCCTTACTGGCTTCCGCAG | 1         |
| <i>bla</i> <sub>NDM-1</sub> | F         | CAGCAAATGGAAACTGGCGACCAA | In-house  |
|                             | R         | ACGGTGATATTGTCACTGGTGTGG | In-house  |
| RAPD-PCR                    | #1283     | GCGATCCCCA               | 2         |
|                             | #1247     | AAGAGCCCGT               | 3         |
| <i>fumC</i>                 | F         | TCACAGGTCGCCAGCGCTTC     | 4         |
|                             | R         | GTACGCAGCGAAAAAGATTC     | 4         |

---

Table S2. Total number of genomes retrieved for each sequence type (ST).

---

| ST     | No. of genomes |
|--------|----------------|
| ST10   | 988            |
| ST12   | 117            |
| ST69   | 242            |
| ST73   | 305            |
| ST80   | 26             |
| ST95   | 348            |
| ST100  | 22             |
| ST135  | 19             |
| ST141  | 38             |
| ST372  | 24             |
| ST537  | 6              |
| ST607  | 15             |
| ST998  | 29             |
| ST1161 | 3              |
| ST1230 | 0              |

---

## References

1. Carattoli, A., *et al.* Identification of plasmids by PCR-based replicon typing. *J. Microbiol. Methods* **63**, 219-228 (2005).
2. Madico, G., Akopyants, N.S. & Berg, D.E. Arbitrarily primed PCR DNA fingerprinting of *Escherichia coli* O157:H7 strains by using templates from boiled cultures. *J. Clin. Microbiol.* **33**, 1534-1536 (1995).
3. Venieri, D., Vantarakis, A., Kominou, G. & Papapetropoulou, M. Differentiation of faecal *Escherichia coli* from human and animal sources by random amplified polymorphic DNA-PCR (RAPD-PCR). *Water Sci. Technol.* **50**, 193-198 (2004).
4. Wirth, T., *et al.* Sex and virulence in *Escherichia coli*: an evolutionary perspective. *Mol. Microbiol.* **60**, 1136-1151 (2006).
